# Supplementary material for: Single Nucleotide Mutagenesis of the TaCHLI Gene Suppressed Chlorophyll and Fatty Acid Biosynthesis in Common Wheat Seedlings
Source: PubMed Central journal article supplement (PMC7046076; doi:10.3389/fpls.2020.00097), 2020-02-20
Supplement: DataSheet_1.pdf [file DataSheet_1.pdf]

## Genetic and physiological analysis of a wheat (*Triticum aestivum* L.) pale-green leaf mutant *chli*

dCHLI-F: TGTCCTGCCTACAATGCGGTA  
TaCHLI-7A: TGTCCTGCCTACAATGCGGTACTGTTTACT.CTCAT  
TaCHLI-7B: TGTCCAACCCACTATGTTCTGCAGGCTCTGACGTAT  
TaCHLI-7D: TGTCCAACCCACAATGTTCTGCTGGCTCTGACGTAT

Figure S1. Primer design of dCHLI-F. Due to the difference of DNA sequence, primer dCHLI-F: TGTCCTGCCTACAATGCGGTA could combine with the DNA sequence of TaCHLI-7A: TGTCCTGCCTACAATGCGGTACTGTTTACT.CTCAT.

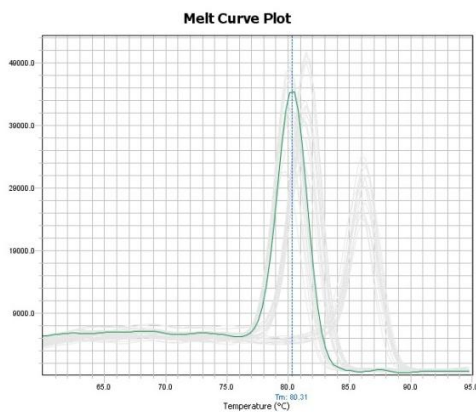

Figure S2. The melt curve plot of TaActin-F/R

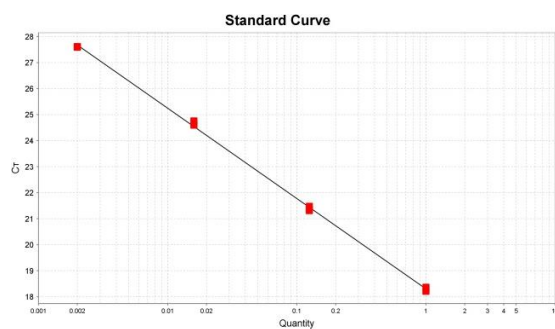

Figure S3. The standard curve of TaActin-F/R. slope=-3.473,  $R^2=0.999$ , efficiency=99.7%.

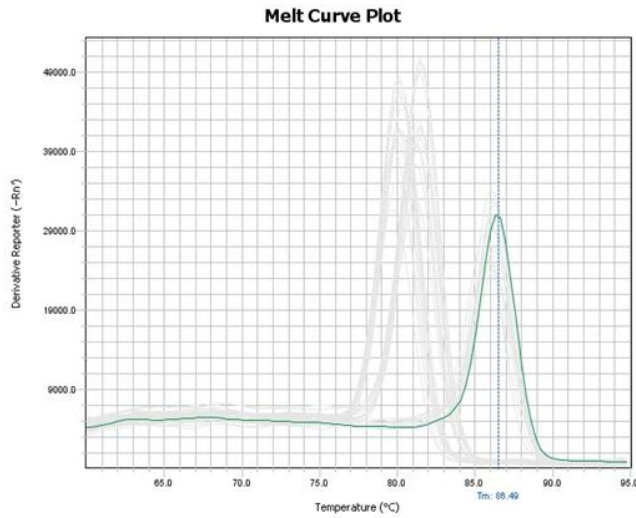

Figure S4. The melt curve plot of qCHLI-F/R.

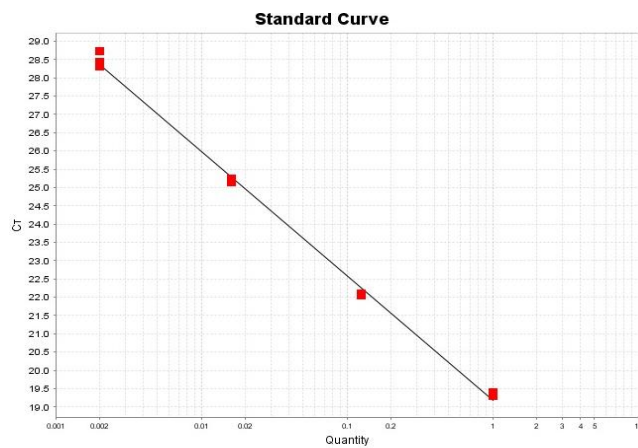

Figure S5. The standard curve of qCHLI-F/R. slope=-3.401, R2=0.997, efficiency=96.8%.

>TraesCS7A02G480700.1(*TaCHLI-7A*)

ATGGCCATGGCCTCCCCGTTCTCCCAGGCGTCGGCCGCCGCCGCTCGCCGGCCCTCCCCTTCTC  
 CGTCTCCACCTCCCGCCCTCTCTCCCTCACCACCGCCGCAACCGCCGCCGTCTCAGCCCGGGCTC  
 CGTGCAGGGGCAGCAGAGGATTCCGCCGCGGCCGCTTCGCCGTCTGCAATGTCGCTGCCCCCTC  
 CGCCGCCGAGCTGGAGACCAAGCCGGCGGCCGCGGAAGGAGAGCCAGCGGCCGGTGTACCC  
 GTCCCGGCGATCGTGGGGCAGGACGAGATGAAGCTCTGCCTGCTGCTCAACGTCATCGACCCC  
 AAGATCGGCGGCGTCATGATAATGGGCGACCGGGGCACCGGCAAGTCCACCACCGTCCGCTCCC  
 TCGTCGACCTGCTCCCGGACATCAGCGTCGTGGTTCGGCGACCCGTTCAACTCCGACCCCTTCGAC  
 CCCGAGGTCATGGGCCCCGAGGTCCGCGACCGCCTCCTCAAGGGCGAGGACCTTCCCGTCACCA  
 CCACCAAGATCACCATGGTCGACCTGCCCTCGGCGCCACCGAGGACAGGGTGTGCGGCACCAT

CGACATTGAGAAGGCGCTCACCGAAGGTGTCAAGGCGTTCGAGCCAGGCCTGCTCGCCAAGGCC  
AACAGGGGGATACTGTATGTGGACGAGGTCAATCTGCTGGACGACCATCTGGTGGATGTTCTGC  
TGGATTCCGCGGCTTCCGGGTGGAACACGGTGGAGAGGGAGGGGCATCTCCATCTCCCACCCTGC  
GCGGTTTCATCTCATTGGGTCCGGTAACCCGGAGGAAGGCGAGCTCCGGCCGCAGCTGCTGGAC  
CGGTTCCGGGATGCACGCGCAGGTTCGGCACGGTCAGGGACGCGGAGCTGAGGGTGAAGATTGTG  
GAGGAGAGGGCTCGGTTTCGACAAGGACCCGAAAACGTTCCGGCAGTCCTACTTGGAGGAGCAA  
GGGAAGCTCCAGGACCAGATCACATCCGCTCGGAGCAACCTCGGTTCTGTGCAGCTCGACCATG  
ATCTCCGGGTTAAGATATCCAGGTGTGTTCTGAGCTGAATGTGGATGGGCTGAGAGGAGACAT  
TGTCATAACAGGGCTGCCAAGGCGTTGGCTGCCCTAAAGGGAAGGGACATCGTGACAGTGGAG  
GACATTGCCACCGTGATTCCCAACTGTTTGAGGCATCGGCTCCGTAAAGACCCACTCGAATCGAT  
CGACTCGGGCTTGCTTGTAGTTGAGAAGTTTTATGAAGTCTTTGGCTAG

> TraesCS7B01G382800.3 (*TaCHLI-7B*)

ATGGCCATGGCCTCCCCGTTCTCCCCGGCCTCGGCCGCCGCCGCTCGCCGGCCCTCTTCTCCGT  
CTCCACCTCCCGCCCTCTCTCCCTCACACCCGCCGCGACCGCCGCGCTCTCAGCCCGGGCTCCGT  
GCAGGGGCAGCAGAGGATTCCGCCGCGGCCGCTTCGCCGTCTGCAATGTCGCCGCCCCCTCCGC  
CGCCGTGCAGGAGACCAAGCCGGCGGGCGGCTGCGAAGGAGAGCCAGCGGCCGGTGTACCCGTT  
CCCGGCGATCGTGGGGCAGGACGAGATGAAGCTCTGCCTGCTGCTCAACGTCATCGACCCCAAG  
ATCGGCGGCGTCATGATCATGGGCGACCGGGGCACCGGCAAGTCCACCACCGTCCGCTCCCTCG  
TCGACCTGCTCCCGGACATCAGCGTCGTTGTTCGGCGACCCGTTCAACTCCGACCCCTACGACCC  
GAGGTCATGGGCCCCGAGGTCCGCGACCGCCTCCTCAAGGGCGAGGACCTTACCGTCACCACCA  
CCAAGATCACCATGGTTCGACCTGCCCTCGGCGCCACCGAGGACAGGGTGTGCGGCACCATCGA  
CATTGAGAAGGCGCTCACCGAAGGTGTCAAGGCGTTCGAGCCAGGCCTGCTTGCCAAGGCCAAC  
AGGGGGATACTGTATGTGGACGAGGTTAATCTGCTGGACGACCATCTGGTGGATGTTCTGCTGG  
ATTCCGCGGCTTCCGGGTGGAACACGGTGGAGAGGGAGGGGCATCTCCATCTCCCACCCTGC  
GCTTCATCTCATTGGGTCCGGTAACCCGGAGGAAGGCGAGCTCCGGCCACAGCTGCTGGACCGG  
TTCGGGATGCACGCGCAGGTTCGGCACGGTCAGGGATGCGGAGCTGAGGGTGAAGATTGTAGAG  
GAGAGGGCTCGGTTTCGACAAGGACCCGAAAACGTTCCGGCAGTCCTACTTGGAGGAGCAAGGG  
AAGCTCCAGGATCAGATCACATCCGCTCGGAGCAACCTCGGTTCTGTGCAGCTCGACCATGATC  
TCCGGGTTAAGATATCCAGGTGTGTTCTGAGCTGAATGTGGATGGGCTGAGAGGAGACATTGT  
CACTAACAGGGCTGCCAAGGCGTTGGCTGCCTTGAAAGGAAGGGACATTGTGACAGTGGAGGA  
CATTGCCACTGTGATCCCCAACTGTTTGAGGCATCGGCTCCGTAAAGACCCGCTCGAATCGATCG  
ACTCGGGCTTGCTTGTAGTTGAGAAGTTTTATGAAGTCTTTGGCTAG

> TraesCS7D01G467500.1 (*TaCHLI-7D*)

ATGGCCATGGCCTCCCCGTTCTCCCCGGCGTTCGGCCGCCGCCACCTCGCCGGCCCTCTTCTCCGT  
CTCCACCTCCCGCCACTCTCCCTCACACCCGCCGCGACCGCCGCCATCTCAGCCCGAGCTCCGT  
CCAGGACCAGCAGAGGGTTCCGCCGCGGCCGCTTCGCCGTCTGCAATGTCGCCGCCCCCTCCGC  
CGCCGTGCAGGAGACCAAGCCGGCGGGCGGCGGAAGGAGAGCCAGCGGCCGGTGTACCCGTT  
CCCGGCGATCGTGGGGCAGGACGAGATGAAGCTCTGCCTGCTGCTCAACGTCATCGACCCCAAG  
ATCGGCGGCGTCATGATCATGGGCGACCGGGGCACCGGCAAGTCCACCACCGTCCGCTCCCTCG  
TCGACCTGCTCCCGGACATCAGCGTCGTTGTTCGGCGACCCGTTCAACTCCGACCCCTTCGACCC  
GAGGTCATGGGCCCCGAGGTCCGTGACCGCCTCCTCAAGGGCGAGGACCTTCCCGTGACCACCA  
CCAAGATCACCATGGTTCGACCTGCCCTCGGCGCCACCGAGGACAGGGTGTGCGGCACCATCGA  
CATTGAGAAGGCGCTCACCGAAGGTGTCAAGGCGTTCGAGCCAGGCCTGCTTGCCAAGGCCAAC  
AGGGGGATACTGTATGTGGACGAGGTCAATCTGCTGGATGACCATCTGGTGGATGTTCTGCTGG  
ATTCCGCGGCGTCTGGGTGGAACACGGTGGAGAGGGAGGGGCATCTCCATCTCCCACCCTGCACG  
GTTTCATCTCATTGGGTCCGGTAACCCGGAGGAAGGCGAGCTCCGGCCGCAGCTGCTGGACCGG

TTCGGGATGCACGCGCAGGTTGGCACGGTCAGGGACGCGGAGCTGAGGGTGAAGATTGTGGAG  
 GAGAGGGCTCGGTTTCGACAAGGACCCAAAAACGTTCCGGCAGTCCTACTTGGAGGAGCAAGGG  
 AAGCTCCAGGACCAGATCACATCCGCTCGGAGCAACCTGGGCTCTGTGCAGCTCGACCATGATC  
 TCCGGGTTAAGATATCCAGGTGTGTTCCGAGCTGAATGTGGATGGACTGAGAGGAGACATTGT  
 CACTAACAGGGCGGCCAAGGCGTTGGCTGCCTTGAAAGGAAGGGACATTGTGACAGTCGAGGA  
 CATTGCCACTGTGATCCCCAACTGTTTGAGGCATCGGCTCCGTAAAGACCCACTCGAATCGATCG  
 ACTCGGGCTTGCTTGTAGTTGAGAAGTTTTATGAAGTCTTTGGCTAG

Figure S6. cDNA sequence of TraesCS7A02G480700.1 (*TaCHLI-7A*), TraesCS7B01G382800.3 (*TaCHLI-7B*) and TraesCS7D01G467500.1 (*TaCHLI-7D*).

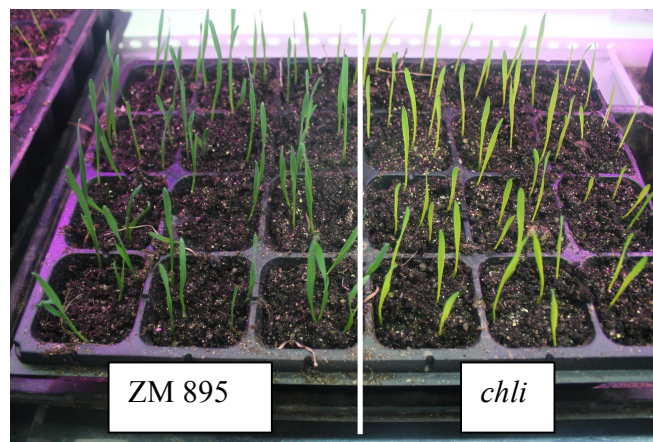

Figure S7. The phenotype of ZM 895 and *chli* mutant at seedling stage.

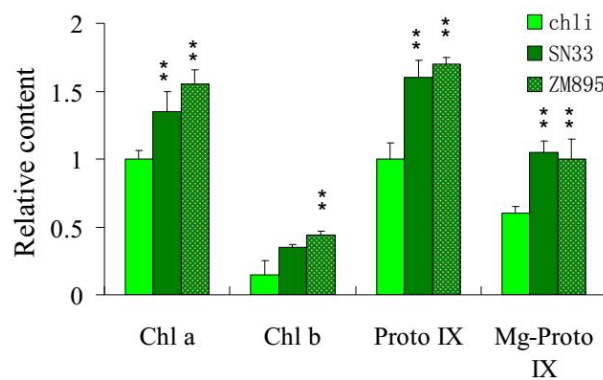

Figure S8. The content of Chl and Proto of *chli*, SN33 and ZM895 at one-leaf stage. \*\* indicate significant differences at  $p < 0.01$ .

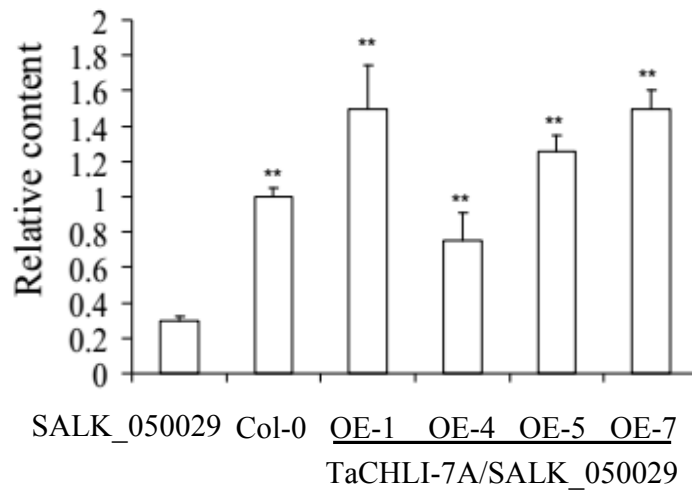

Figure S9. The content of Chl of homozygous T<sub>2</sub> generation transgenic plants. SALK\_050029: CHLI mutant Arabidopsis; WT: wild type Arabidopsis; OE is overexpression. \*\* indicate significant differences at  $p < 0.01$ .

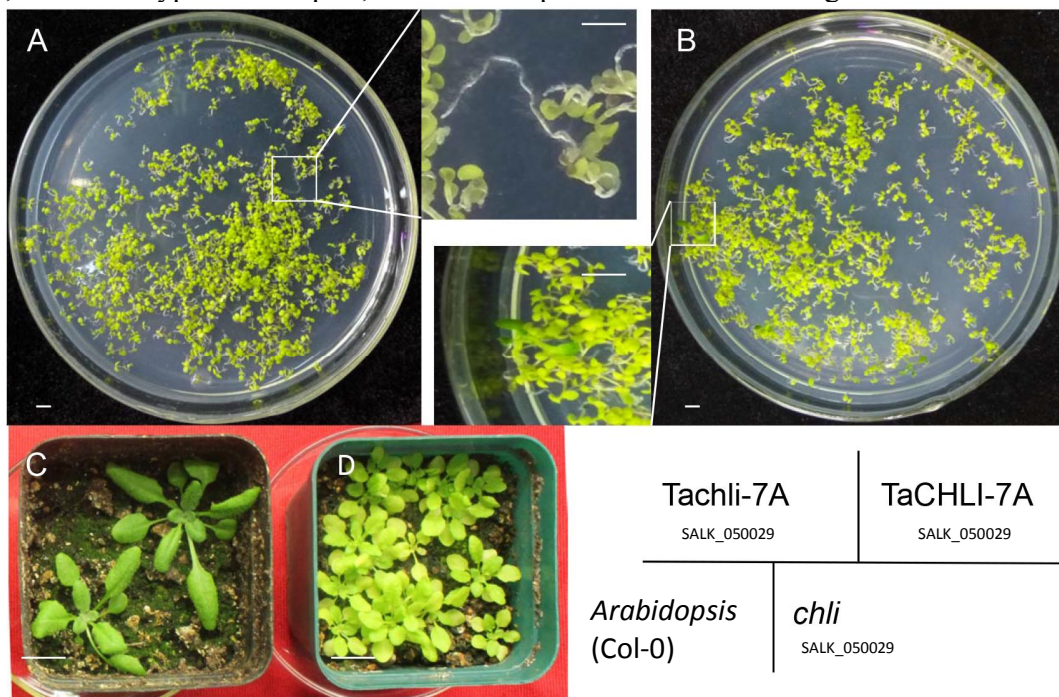

Figure S10. Phenotypes of *Arabidopsis* SALK\_050029 mutant carrying *TaCHLI-7A* and *Tachli-7A* genes. **(A)** Transgenic SALK\_050029 mutants carrying 35s::*Tachli-7A*. **(B)** Transgenic SALK\_050029 mutants carrying 35s::*TCHLI-7A*. **(C)** 3-week old *Arabidopsis* (Col-0). **(D)** 3-week old SALK\_050029 mutants *Arabidopsis*.

Bars = 5 mm.

### 1. The method used in q-PCR:

Run the qPCR according to the following cycle protocol:

Enzyme activation 95°C, hold 3 min;  
 Denaturation 95°C 5 s } 40 cycles;  
 Annealing 60°C 20 s }

**2. SNP filtering method:**

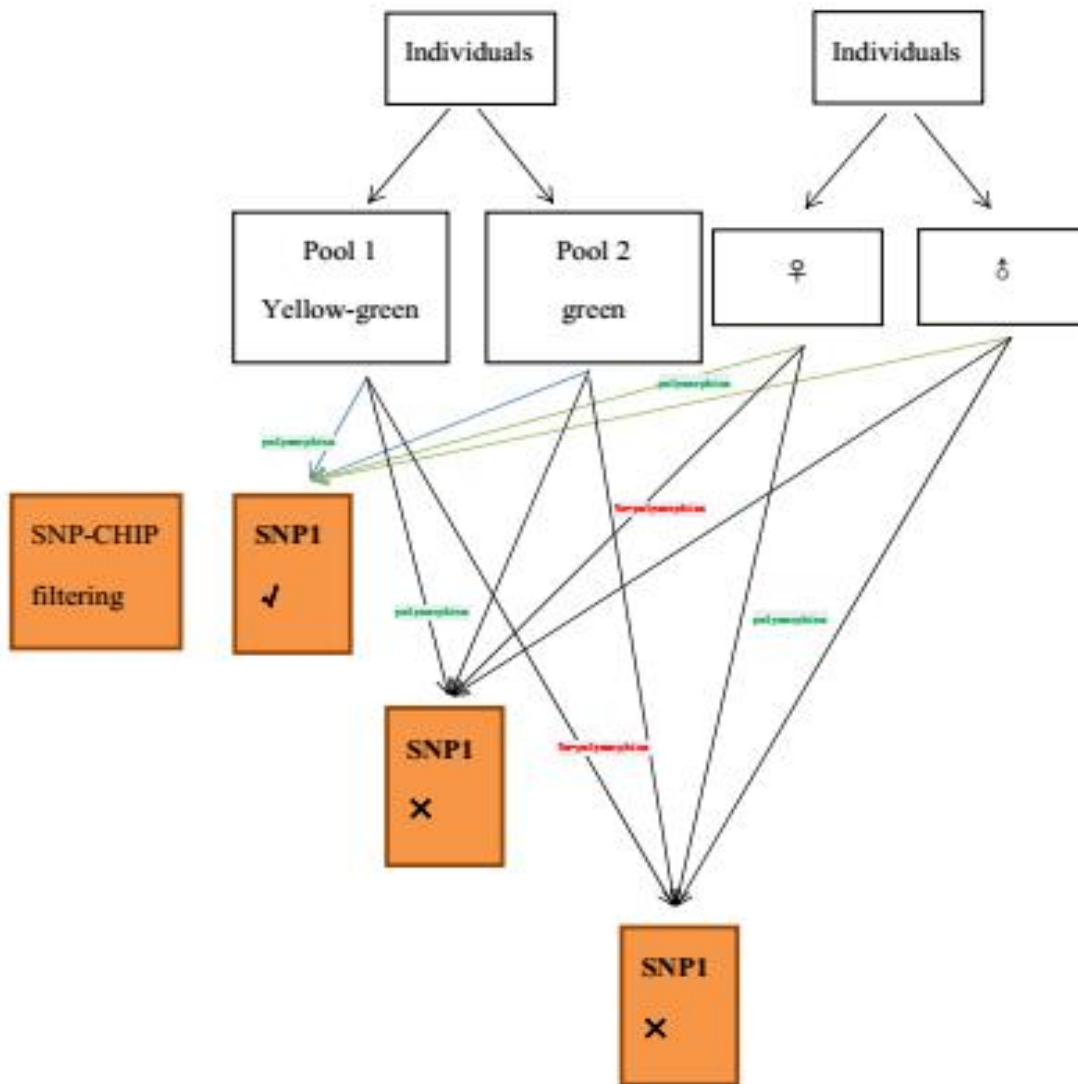

SNP filtration by using following method: i. deleting the SNP which were not detected in Chinese Spring wheat physical map; ii. deleting the SNP which were missing in one of two DNA pools; iii. Deleting the SNP which were no polymorphism between parental DNA or two DNA pool. The SNP distribution frequency ratio (polymorphism SNP numbers/total SNP mapped to the wheat physical map) on wheat chromosome physical map was calculated per 10 Mb physical intervals.

**3. The process of identifying candidate gene:**

First we locked this mutant gene in a 10 Mb interval in chromosome, the mutant chl<sub>i</sub> exhibited a chlorophyll deficiency phenotype.

Then, we blast the chlorophyll synthesis relative genes by using the genes from rice and Arabidopsis.

Finally, chlorophyll synthesis relative gene TaCHLI was found in this 10 Mb interval. Therefore, we consider it as the candidate gene and more confirmed experiments were done.

Chlorophyll synthesis relative genes in rice, *Arabidopsis* and common wheat:

| Gene/protein                                               | gene         | correspond to rice (NCBI) | correspond to <i>Arabidopsis</i> (NCBI) | correspond to Common wheat (IWGSC RefSeq v1.0)                 | chromosome    |
|------------------------------------------------------------|--------------|---------------------------|-----------------------------------------|----------------------------------------------------------------|---------------|
| Glutamyl tRNA reductase                                    | <i>HEMA1</i> |                           | At1g58290                               | TraesCS1D01G165600                                             | 1A, 1B, 1D    |
|                                                            | <i>HEMA2</i> |                           | At1g09940                               | TraesCS1A01G173100                                             |               |
|                                                            | <i>HEMA3</i> | Loc_Os10g35840            | At2g31250                               | TraesCS1B01G058300                                             |               |
| Glutamate-1-semialdehyde aminotransferase 2,1Aminomutase   | <i>GSA1</i>  |                           | At5g63570                               | TraesCS7A01G260800<br>TraesCS7B01G158800<br>TraesCS7D01G261800 | 7As, 7Bs, 7Ds |
|                                                            | <i>GSA2</i>  | Loc_Os08g41990            | At3g48730                               | TraesCS6A01G107900<br>TraesCS6B01G136500<br>TraesCS6D01G095800 |               |
| 5-Aminolevulinic acid dehydratase                          | <i>HEMB1</i> |                           | At1g69740                               | TraesCS6A01G143300                                             | 6As, 6Bs, 6Ds |
|                                                            | <i>HEMB2</i> |                           | At1g44318                               | TraesCS6B01G171600                                             |               |
| Porphobilinogen deaminase                                  | <i>HEMC</i>  | Loc_Os02g07230            | At5g08280                               | TraesCS6D01G132500<br>TraesCS4A01G002800<br>TraesCS4B01G302400 | 6As, 6Bs, 6Ds |
| Uroporphyrinogen III synthase                              | HEMD         | Loc_Os03g08730            | At2g26540                               | TraesCS4D01G300900<br>TraesCS3A01G224800<br>TraesCS3B01G254400 | 4Bl, 4Dl, 4As |
|                                                            | HEME1        | Loc_Os01g43390            | At3g14930                               | TraesCS3D01G228800<br>TraesCS3A01G175600<br>TraesCS3B01G205300 |               |
| Uroporphyrinogen III decarboxylase                         | HEME2        | Loc_Os03g21990            | At2g40490                               | TraesCS3D01G181100                                             | 3As, 3Bs, 3Ds |
|                                                            | HEMF1        | Loc_Os04g52130            | At1g03475                               | TraesCS2A01G426900<br>TraesCS2B01G447300                       |               |
| Coproporphyrinogen oxidase                                 | HEMF2        |                           | At4g03205                               | TraesCS2D01G425000<br>TraesCS5A01G045700<br>TraesCS5B01G049800 | 2Al, 2Bl, 2Dl |
|                                                            | HEMG1        | Loc_Os01g18320            | At4g01690                               | TraesCS5D01G055700<br>TraesCS2A01G347900<br>TraesCS2B01G366300 |               |
| PPO, protoporphyrinogen IX oxidase                         | HEMG2        | Loc_Os04g41260            | At5g14220                               | TraesCS2D01G346200                                             | 2Al, 2Bl, 2Dl |
|                                                            | ChL11        | Loc_Os03g36540            | At4g18480                               | TraesCS7A01G480700<br>TraesCS7B01G382800                       |               |
| Mg-chelatase I subunit                                     | ChL12        |                           | At5g45930                               | TraesCS7D01G467500<br>TraesCS5A01G466100<br>TraesCS5B01G477800 | 7Al, 7Bl, 7Dl |
| Mg-chelatase D subunit                                     | CHLD         | Loc_Os03g59640            | At1g08520                               | TraesCS5D01G478900<br>TraesCS2A01G134000<br>TraesCS2B01G157600 | 5AL, 5Bl, 5Dl |
| Mg-chelatase H subunit                                     | CHLH         | Loc_Os03g20700            | At5g13630                               | TraesCS2D01G136200<br>TraesCS7A01G068500<br>TraesCS4A01G420600 | 2As, 2Bs, 2Ds |
| Mg-protoporphyrin IX methyltransferase                     | ChLM         | Loc_Os06g04150            | At4g25080                               | TraesCS7D01G062900<br>TraesCS3A01G191700<br>TraesCS3B01G219700 | 7As, 4A, 7Ds  |
| Mg-protoporphyrin IX monomethylase cyclase                 | CHL27        | Loc_Os01g17170            | At3g56940                               | TraesCS3D01G194300<br>TraesCS6A01G403800<br>TraesCS6B01G447700 | 3As, 3Bs, 3Ds |
| 8-vinyl reductase NADPH-protochlorophyllide oxidoreductase | DVR          | Loc_Os03g22780            | At5g18660                               | TraesCS6D01G387300                                             | 6AL, 6Bl, 6Dl |
|                                                            | PORA         | Loc_Os04g58200            | At5g54190                               | TraesCS2A01G590600<br>TraesCS2B01G593000<br>TraesCS2D01G563600 |               |

|                         |      |                |           |                                                                |               |
|-------------------------|------|----------------|-----------|----------------------------------------------------------------|---------------|
| PORB                    |      | Loc_Os10g35370 | At4g27440 | TraesCS1A01G171000<br>TraesCS1B01G186300<br>TraesCS1D01G168700 | 1AI, 1BI, 1DI |
| PORC                    |      | Loc_Os10g35730 | At1g03630 | TraesCS1A01G171000<br>TraesCS1B01G186300<br>TraesCS1D01G168700 | 1AI, 1BI, 1DI |
| Chlorophyll synthase    | ChLG | Loc_Os05g28200 | At3g51820 | TraesCS1A01G224700<br>TraesCS1B01G237700<br>TraesCS1D01G226100 | 1AI, 1BI, 1DI |
| Chlorophyll a oxygenase | CAO  | Loc_Os10g41780 | At1g44446 | TraesCS3A01G506200<br>TraesCS3B01G574300<br>TraesCS3D01G514100 | 3AI, 3BI, 3DI |

\* correspond to Common wheat gene based on IWGSC RefSeq v1.0.

#### 4. The measurement of proto ix and mg-proto ix by HPLC

**Table1. Analyte:** proto IX

| Sample Name       | Sample Type | Area (Y*sec) | (min) | Target [Conc]. (pmol/mL) | Calculated Conc.samp (pmol/mL) |
|-------------------|-------------|--------------|-------|--------------------------|--------------------------------|
| WCSWCJ20191212-S  | Standard    | 1453         | 25.8  | 50                       |                                |
| WCSWCJ20191212-1  | M1-1        | 5017         | 25.4  | N/A                      | 173                            |
| WCSWCJ20191212-2  | M1-2        | 4742         | 25.5  | N/A                      | 163                            |
| WCSWCJ20191212-3  | M1-3        | 5510         | 25.5  | N/A                      | 190                            |
| WCSWCJ20191212-4  | M2-1        | 6699         | 25.7  | N/A                      | 231                            |
| WCSWCJ20191212-5  | M2-2        | 7453         | 25.4  | N/A                      | 257                            |
| WCSWCJ20191212-6  | M2-3        | 7801         | 25.9  | N/A                      | 269                            |
| WCSWCJ20191212-7  | S1-1        | 11107        | 25.2  | N/A                      | 383                            |
| WCSWCJ20191212-8  | S1-2        | 10701        | 25.4  | N/A                      | 369                            |
| WCSWCJ20191212-9  | S1-3        | 11310        | 25.9  | N/A                      | 390                            |
| WCSWCJ20191212-10 | S2-1        | 10469        | 25.6  | N/A                      | 361                            |
| WCSWCJ20191212-11 | S2-2        | 10092        | 25.3  | N/A                      | 348                            |
| WCSWCJ20191212-12 | S2-3        | 10730        | 25.7  | N/A                      | 370                            |
| WCSWCJ20191212-13 | S6-1        | 38222        | 25.2  | N/A                      | 1318                           |
| WCSWCJ20191212-14 | S6-2        | 42050        | 25.9  | N/A                      | 1450                           |
| WCSWCJ20191212-15 | S6-3        | 37091        | 25.3  | N/A                      | 1279                           |
| WCSWCJ20191212-16 | S7-1        | 36192        | 25.4  | N/A                      | 1248                           |
| WCSWCJ20191212-17 | S7-2        | 34655        | 25.6  | N/A                      | 1195                           |
| WCSWCJ20191212-18 | S7-3        | 37265        | 25.2  | N/A                      | 1285                           |
| WCSWCJ20191212-19 | S8-1        | 39411        | 25.9  | N/A                      | 1359                           |
| WCSWCJ20191212-20 | S8-2        | 37294        | 25.7  | N/A                      | 1286                           |
| WCSWCJ20191212-21 | S8-3        | 39730        | 25.8  | N/A                      | 1370                           |
| WCSWCJ20191212-22 | S9-1        | 35351        | 25.4  | N/A                      | 1219                           |
| WCSWCJ20191212-23 | S9-2        | 37700        | 25.0  | N/A                      | 1300                           |
| WCSWCJ20191212-24 | S9-3        | 42224        | 25.7  | N/A                      | 1456                           |
| WCSWCJ20191212-25 | S11-1       | 44660        | 26.0  | N/A                      | 1540                           |
| WCSWCJ20191212-26 | S11-2       |              |       |                          |                                |
| WCSWCJ20191212-27 | S11-3       | 38541        | 25.4  | N/A                      | 1329                           |
| WCSWCJ20191212-28 | S13-1       |              |       |                          |                                |
| WCSWCJ20191212-29 | S13-2       | 44689        | 25.7  | N/A                      | 1541                           |
| WCSWCJ20191212-30 | S13-3       | 42311        | 25.9  | N/A                      | 1459                           |
| WCSWCJ20191212-31 | S15-1       | 44892        | 25.5  | N/A                      | 1548                           |
| WCSWCJ20191212-32 | S15-2       | 39875        | 25.4  | N/A                      | 1375                           |
| WCSWCJ20191212-33 | S15-3       | 40687        | 26.2  | N/A                      | 1403                           |
| WCSWCJ20191212-34 | S19-1       | 39382        | 25.4  | N/A                      | 1358                           |



| Sample Name       | Sample Type | Area (Y*sec) | (min) | Target [Conc]. (pmol/mL) | Calculated Conc.samp (pmol/mL) |
|-------------------|-------------|--------------|-------|--------------------------|--------------------------------|
| WCSWCJ20191212-35 | S19-2       | 41383        | 25.2  | N/A                      | 1427                           |
| WCSWCJ20191212-36 | S19-3       | 44515        | 25.3  | N/A                      | 1535                           |

Standard: 50 pmol/mL  
E400/F630

M1: mutant chli one-leaf stage

M2: mutant chli three-leaf stage

S1: SN33 one-leaf stage

S2: SN33 three-leaf stage

S6-S19: 6h-19h

Area (Y\*sec): Y= Corresponding luminous intensity in HPLC Y axis.

**Table2. Analyte: Mg-proto IX**

| Sample Name       | Sample Type | Area (Y*sec) | (min) | Target [Conc]. (pmol/mL) | Calculated Conc.samp (pmol/mL) |
|-------------------|-------------|--------------|-------|--------------------------|--------------------------------|
| WCSWCJ20191212-S  | Standard    | 7248         | 15.7  | 50                       |                                |
| WCSWCJ20191212-1  | M1-1        | 16815        | 15.4  | N/A                      | 116                            |
| WCSWCJ20191212-2  | M1-2        | 14931        | 15.6  | N/A                      | 103                            |
| WCSWCJ20191212-3  | M1-3        | 13191        | 15.1  | N/A                      | 91                             |
| WCSWCJ20191212-4  | M2-1        | 29427        | 15.7  | N/A                      | 203                            |
| WCSWCJ20191212-5  | M2-2        | 34356        | 15.4  | N/A                      | 237                            |
| WCSWCJ20191212-6  | M2-3        | 27397        | 15.8  | N/A                      | 189                            |
| WCSWCJ20191212-7  | S1-1        | 45662        | 15.3  | N/A                      | 315                            |
| WCSWCJ20191212-8  | S1-2        | 40734        | 15.7  | N/A                      | 281                            |
| WCSWCJ20191212-9  | S1-3        | 49286        | 15.7  | N/A                      | 340                            |
| WCSWCJ20191212-10 | S2-1        | 45083        | 15.7  | N/A                      | 311                            |
| WCSWCJ20191212-11 | S2-2        | 50881        | 15.2  | N/A                      | 351                            |
| WCSWCJ20191212-12 | S2-3        | 48852        | 15.2  | N/A                      | 337                            |
| WCSWCJ20191212-13 | S6-1        | 59289        | 15.5  | N/A                      | 409                            |
| WCSWCJ20191212-14 | S6-2        | 56100        | 15.7  | N/A                      | 387                            |
| WCSWCJ20191212-15 | S6-3        | 62623        | 15.4  | N/A                      | 432                            |
| WCSWCJ20191212-16 | S7-1        | 57404        | 15.9  | N/A                      | 396                            |
| WCSWCJ20191212-17 | S7-2        | 65522        | 15.6  | N/A                      | 452                            |
| WCSWCJ20191212-18 | S7-3        | 66827        | 15.4  | N/A                      | 461                            |
| WCSWCJ20191212-19 | S8-1        | 65377        | 15.5  | N/A                      | 451                            |
| WCSWCJ20191212-20 | S8-2        | 67406        | 15.6  | N/A                      | 465                            |
| WCSWCJ20191212-21 | S8-3        | 62188        | 15.2  | N/A                      | 429                            |
| WCSWCJ20191212-22 | S9-1        | 58999        | 15.2  | N/A                      | 407                            |
| WCSWCJ20191212-23 | S9-2        | 64942        | 15.3  | N/A                      | 448                            |
| WCSWCJ20191212-24 | S9-3        | 60303        | 15.4  | N/A                      | 416                            |
| WCSWCJ20191212-25 | S11-1       | 62333        | 15.5  | N/A                      | 430                            |
| WCSWCJ20191212-26 | S11-2       |              |       |                          |                                |
| WCSWCJ20191212-27 | S11-3       | 61898        | 15.3  | N/A                      | 427                            |
| WCSWCJ20191212-28 | S13-1       |              |       |                          |                                |
| WCSWCJ20191212-29 | S13-2       | 63492        | 15.3  | N/A                      | 438                            |
| WCSWCJ20191212-30 | S13-3       | 62188        | 15.8  | N/A                      | 429                            |
| WCSWCJ20191212-31 | S15-1       | 66102        | 15.6  | N/A                      | 456                            |
| WCSWCJ20191212-32 | S15-2       | 60158        | 15.4  | N/A                      | 415                            |

| Sample Name       | Sample Type | Area (Y*sec) | (min) | Target [Conc]. (pmol/mL) | Calculated Conc.samp (pmol/mL) |
|-------------------|-------------|--------------|-------|--------------------------|--------------------------------|
| WCSWCJ20191212-33 | S15-3       | 56969        | 15.2  | N/A                      | 393                            |
| WCSWCJ20191212-34 | S19-1       | 69726        | 15.5  | N/A                      | 481                            |
| WCSWCJ20191212-35 | S19-2       | 65377        | 15.5  | N/A                      | 451                            |
| WCSWCJ20191212-36 | S19-3       | 60738        | 15.8  | N/A                      | 419                            |

Standard: 50 pmol/mL

E416/F595

M1: mutant chli one-leaf stage

M2: mutant chli three-leaf stage

S1: SN33 one-leaf stage

S2: SN33 three-leaf stage

S6-S19: 6h-19h

Area (Y\*sec): Y= Corresponding luminous intensity in HPLC Y axis

The first peak in ~15 min is mg-proto ix, second peak in ~25min is proto ix

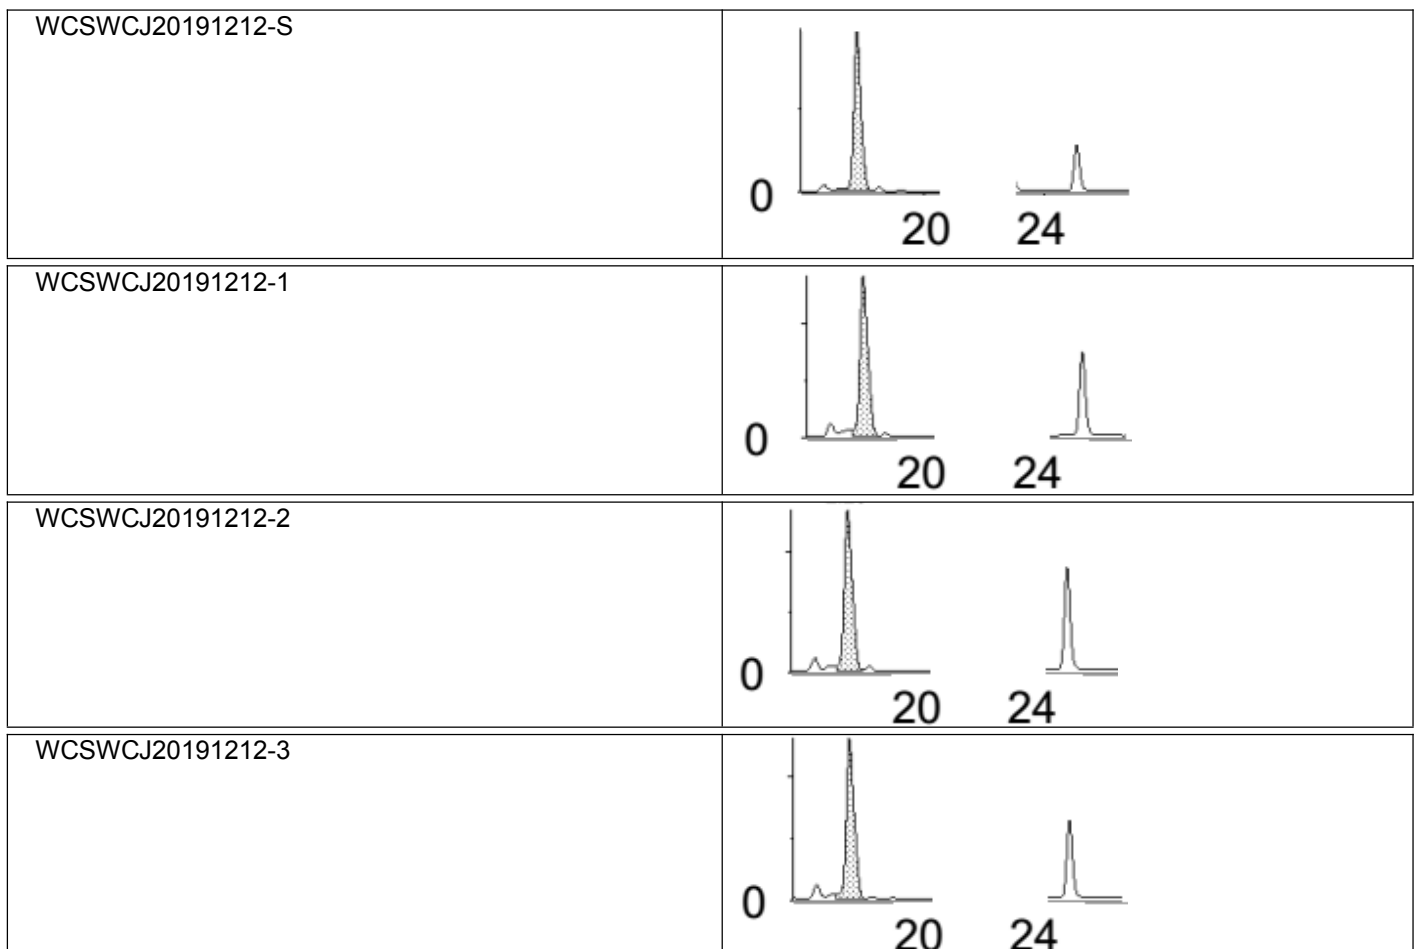

|                   |                                                                                      |
|-------------------|--------------------------------------------------------------------------------------|
| WCSWCJ20191212-4  | 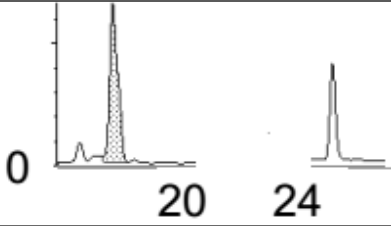   |
| WCSWCJ20191212-5  |    |
| WCSWCJ20191212-6  |    |
| WCSWCJ20191212-7  |   |
| WCSWCJ20191212-8  |  |
| WCSWCJ20191212-9  |  |
| WCSWCJ20191212-10 |  |

|                   |                                                                                      |
|-------------------|--------------------------------------------------------------------------------------|
| WCSWCJ20191212-11 | 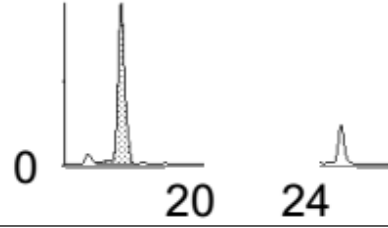   |
| WCSWCJ20191212-12 |    |
| WCSWCJ20191212-13 |    |
| WCSWCJ20191212-14 |   |
| WCSWCJ20191212-15 |  |
| WCSWCJ20191212-16 |  |
| WCSWCJ20191212-17 |  |

|                   |  |
|-------------------|--|
| WCSWCJ20191212-18 |  |
| WCSWCJ20191212-19 |  |
| WCSWCJ20191212-20 |  |
| WCSWCJ20191212-21 |  |
| WCSWCJ20191212-22 |  |
| WCSWCJ20191212-23 |  |

|                   |                                                                                      |
|-------------------|--------------------------------------------------------------------------------------|
| WCSWCJ20191212-24 | 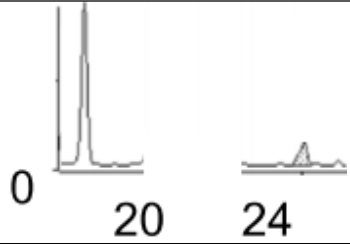   |
| WCSWCJ20191212-25 |    |
| WCSWCJ20191212-26 |    |
| WCSWCJ20191212-27 |   |
| WCSWCJ20191212-28 |  |
| WCSWCJ20191212-29 |  |
| WCSWCJ20191212-30 |  |

|                   |                                                                                      |
|-------------------|--------------------------------------------------------------------------------------|
| WCSWCJ20191212-31 | 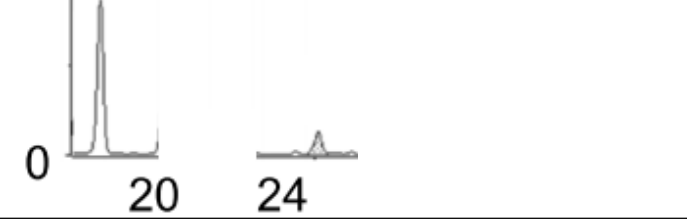   |
| WCSWCJ20191212-32 |    |
| WCSWCJ20191212-33 |    |
| WCSWCJ20191212-34 |   |
| WCSWCJ20191212-35 |  |
| WCSWCJ20191212-36 |  |
